# Supplementary material for: Duration of post–COVID-19 symptoms is associated with sustained SARS-CoV-2–specific immune responses
Source: PubMed Central journal article supplement (PMC8410022; doi:10.1172/jci.insight.151544), 2021-08-09
Supplement: jciinsight-6-151544-s174.pdf [file jciinsight-6-151544-s174.pdf]

| PTID | Race | Ethnicity | Sex | PCR+ | Ab+ | Hospitalization Status | Peak Ordinal Score | Symptom Presentation |         |             |       |       |         |          |                 | Symptom Duration | Medications In Acute Infection | Comorbidities              |
|------|------|-----------|-----|------|-----|------------------------|--------------------|----------------------|---------|-------------|-------|-------|---------|----------|-----------------|------------------|--------------------------------|----------------------------|
|      |      |           |     |      |     |                        |                    | Dyspnea              | Fatigue | Psychataxia | Cough | Fever | Myalgia | GI Upset | Anosmia/Aguesia |                  |                                |                            |
| P01  | C    | H         | F   | Y    | Y   | Y                      | 5                  | X                    | X       | X           | X     | X     | X       | X        | X               | 148              |                                | obesity                    |
| P02  | C    | NH        | F   | Y    | N   | Y                      | 4                  | X                    | X       | X           | X     | X     | X       | X        | X               | 136              | Steroids                       | obesity, asthma            |
| P03  | C    | NH        | M   | n/a  | Y   | N                      | 2                  |                      | X       | X           | X     | X     | X       |          | X               | 47               |                                |                            |
| P04  | C    | NH        | F   | Y    | N   | N                      | 2                  | X                    | X       | X           | X     | X     | X       | X        |                 | 208              |                                |                            |
| P05  | C    | NH        | F   | Y    | Y   | N                      | 2                  | X                    | X       |             | X     | X     |         | X        | X               | 40               |                                | sleep apnea, Afib          |
| P06  | C    | n/a       | F   | Y    | N   | N                      | 2                  |                      | X       |             | X     |       |         |          | X               | 42               |                                |                            |
| P07  | C    | NH        | F   | Y    | Y   | N                      | 2                  | X                    | X       | X           | X     | X     | X       | X        | X               | 33               |                                |                            |
| P08  | C    | NH        | F   | Y    | Y   | N                      | 2                  | X                    | X       | X           | X     | X     | X       | X        | X               | 76               |                                |                            |
| P09  | AA   | NH        | M   | Y    | Y   | N                      | 2                  | X                    |         |             | X     | X     | X       | X        | X               | 94               |                                |                            |
| P10  | C    | NH        | M   | N    | Y   | Y                      | n/a                |                      | X       | X           | X     | X     | X       | X        | X               | 188              | n/a                            |                            |
| P11  | AA   | NH        | F   | Y    | Y   | Y                      | 5                  | X                    |         | X           | X     | X     |         | X        | X               | 198              |                                | diabetes, HTN              |
| P12  | C    | NH        | M   | Y    | Y   | Y                      | 5                  | X                    | X       |             | X     |       | X       | X        | X               | 200              |                                | HTN, bypass surgery        |
| P13  | C    | NH        | F   | Y    | Y   | Y                      | 5                  | X                    | X       | X           | X     | X     | X       |          | X               | 90               | Remdesivir                     | HTN, diabetes, sleep apnea |
| P14  | C    | NH        | M   | Y    | N   | N                      | 2                  | X                    |         |             |       |       |         |          |                 | 62               |                                | asthma                     |
| P15  | C    | NH        | F   | Y    | Y   | N                      | 2                  | X                    | X       | X           | X     | X     | X       |          | X               | 99               |                                | SVT                        |
| P16  | C    | NH        | F   | Y    | Y   | Y                      | n/a                | X                    | X       | X           | X     | X     |         | X        | X               | 115              |                                | pericarditis               |
| P17  | C    | NH        | M   | Y    | N   | Y                      | 5                  | X                    | X       | X           | X     | X     | X       | X        | X               | 45               |                                | HTN                        |
| P18  | AA   | NH        | M   | Y    | Y   | Y                      | 5                  | X                    | X       | X           | X     | X     |         |          | X               | 30               |                                | HTN, diabetes              |
| P19  | C    | NH        | M   | N    | Y   | N                      | 2                  |                      | X       |             | X     |       | X       |          |                 | 34               |                                |                            |
| P20  | AA   | NH        | M   | Y    | Y   | Y                      | 7                  | X                    | X       | X           | X     | X     | X       | X        | X               | 139              | Remdesivir                     | diabetes, HTN, sleep apnea |
| R01  | C    | NH        | M   | Y    | Y   | N                      | 2                  |                      | X       |             | X     | X     |         |          |                 | 3                |                                | HTN, Afib                  |
| R02  | C    | NH        | F   | Y    | N   | N                      | 2                  |                      |         |             | X     |       |         |          |                 | 4                |                                | HTN                        |
| R03  | C    | NH        | M   | Y    | Y   | N                      | 2                  | X                    |         |             |       |       | X       |          |                 | 3                |                                |                            |
| R04  | A    | NH        | F   | Y    | Y   | N                      | 2                  |                      | X       |             | X     | X     | X       |          | X               | 16               |                                |                            |
| R05  | A    | NH        | M   | Y    | Y   | N                      | 2                  |                      | X       | X           | X     | X     | X       | X        | X               | 12               |                                |                            |
| R06  | C    | H         | F   | Y    | Y   | N                      | 2                  | X                    |         |             | X     | X     | X       | X        | X               | 15               |                                | asthma                     |
| R07  | C    | NH        | F   | Y    | N   | N                      | 2                  | X                    | X       | X           |       | X     | X       |          |                 | 12               |                                |                            |
| R08  | C    | NH        | M   | Y    | N   | N                      | 2                  | X                    | X       | X           | X     | X     | X       | X        | X               | 12               |                                |                            |
| R09  | C    | NH        | M   | Y    | Y   | N                      | 2                  |                      | X       |             | X     | X     | X       |          |                 | 1                |                                |                            |
| R10  | C    | NH        | M   | Y    | Y   | N                      | 2                  |                      | X       | X           | X     | X     | X       |          | X               | 8                |                                | sleep apnea                |
| R11  | C    | NH        | M   | Y    | Y   | N                      | 2                  |                      | X       | X           | X     | X     | X       | X        |                 | 7                |                                | HTN                        |
| R12  | C    | NH        | M   | Y    | Y   | N                      | 2                  | X                    | X       |             | X     | X     |         | X        |                 | 4                |                                |                            |
| R13  | C    | NH        | M   | Y    | Y   | N                      | 2                  |                      | X       |             | X     |       | X       |          |                 | 10               |                                | Afib                       |
| R14  | C    | NH        | F   | Y    | N   | N                      | 2                  | X                    | X       | X           | X     |       | X       | X        |                 | 11               |                                | asthma, HTN                |
| R15  | C    | n/a       | F   | Y    | Y   | N                      | 2                  | X                    | X       | X           |       | X     | X       |          | X               | 14               |                                |                            |
| R16  | AA   | NH        | F   | Y    | Y   | N                      | 2                  | X                    | X       | X           | X     | X     | X       | X        |                 | 16               |                                |                            |
| R17  | A    | NH        | F   | Y    | N   | N                      | 2                  | X                    | X       |             | X     |       |         |          |                 | 15               |                                |                            |
| R18  | C    | NH        | M   | Y    | Y   | N                      | 2                  |                      | X       | X           | X     | X     | X       | X        |                 | 5                |                                | HTN                        |
| R19  | C    | NH        | F   | Y    | N   | N                      | 2                  |                      | X       |             |       |       | X       |          | X               | 7                |                                |                            |
| R20  | AA   | NH        | F   | Y    | Y   | N                      | 2                  |                      | X       | X           | X     | X     | X       | X        |                 | 20               |                                |                            |
| R21  | AA   | NH        | M   | n/a  | Y   | N                      | 2                  | X                    | X       | X           | X     | X     | X       | X        | X               | 14               |                                | HTN                        |
| R22  | C    | NH        | M   | Y    | Y   | N                      | 2                  |                      | X       |             |       |       |         | X        |                 | 4                |                                |                            |
| R23  | A    | NH        | M   | Y    | Y   | N                      | 2                  |                      | X       |             |       |       | X       | X        | X               | 5                |                                |                            |
| R24  | C    | NH        | M   | Y    | Y   | N                      | 2                  |                      | X       | X           | X     | X     | X       |          | X               | 11               |                                | HTN                        |
| R25  | A    | NH        | F   | Y    | Y   | N                      | 2                  |                      | X       |             | X     | X     | X       |          | X               | 2                |                                |                            |
| R26  | AA   | NH        | M   | Y    | Y   | N                      | 2                  | X                    | X       |             |       | X     | X       |          | X               | 3                |                                |                            |
| R27  | C    | NH        | M   | Y    | N   | N                      | 2                  |                      | X       |             | X     |       | X       |          | X               | 7                |                                |                            |
| R28  | AA   | NH        | F   | Y    | Y   | N                      | 2                  |                      | X       |             | X     | X     | X       |          | X               | 5                |                                |                            |
| R29  | AA   | NH        | F   | Y    | Y   | N                      | 2                  |                      |         |             | X     | X     | X       | X        |                 | 8                |                                |                            |
| R30  | C    | NH        | M   | n/a  | Y   | N                      | 2                  | X                    | X       | X           | X     | X     |         |          |                 | 14               |                                | HTN                        |

**Supplemental Table 1: Individual Patient Data.** PTID: patient ID; P#=prolonged group, R#=recovered group. Race: C=Caucasian, AA=African American, A= Asian. Ethnicity: H=Hispanic, NH=non-Hispanic. PCR+: result of RT-PCR SARS-CoV-2 diagnostic test. Ab+: result of N-protein-specific antibody test. Peak ordinal score: score from 2-7 based on WHO ordinal scale. Medications in acute infection: medications used during treatment of acute COVID infection during hospitalization.

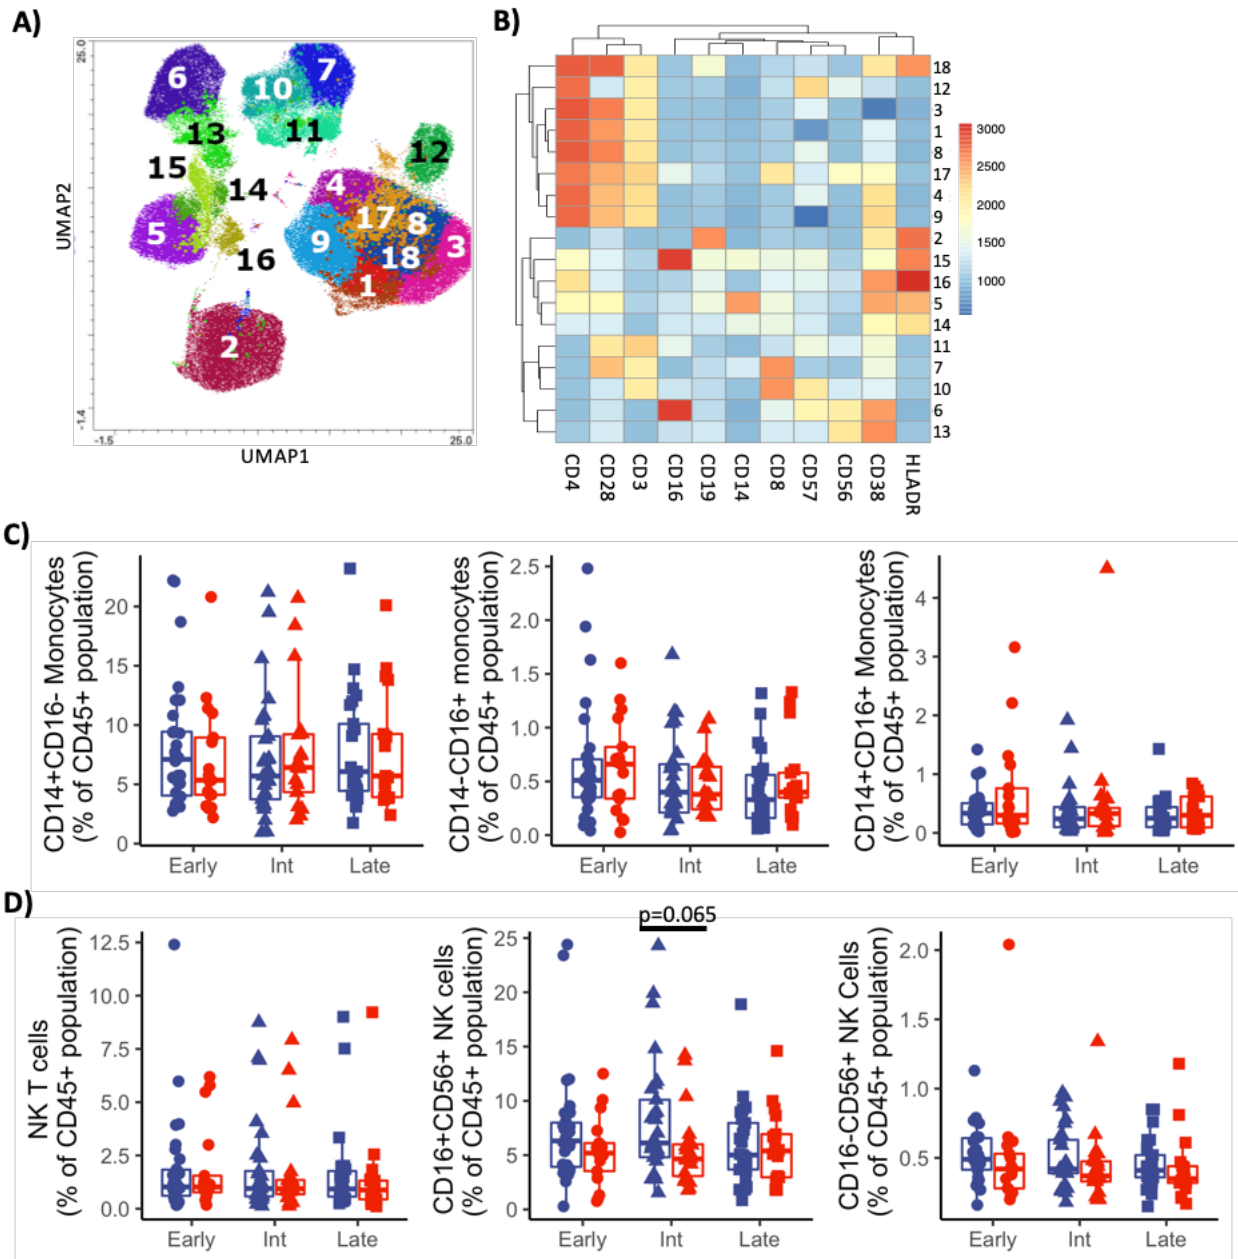

**Supplemental Figure 1: Frequencies of innate immune cells show no difference between prolonged and recovered groups.** Investigation into recovered (n=30) and prolonged (n=20) groups and the frequencies of innate immune cell subsets including: **A-B)** Overview of UMAP clustering and corresponding heatmap with 18 total clusters identified. **C)** CD14+, CD16+, and CD14+CD16+ monocyte populations; **D)** NK T cells, CD16+CD56+ NK cells and CD16-CD56+ NK cells. Navy=recovered group, red=prolonged group; circles=early, triangles=intermediate, squares=late. Boxplots indicate median, IQR, and 95% confidence interval; significance determined by the unpaired Wilcoxon rank sum tests.

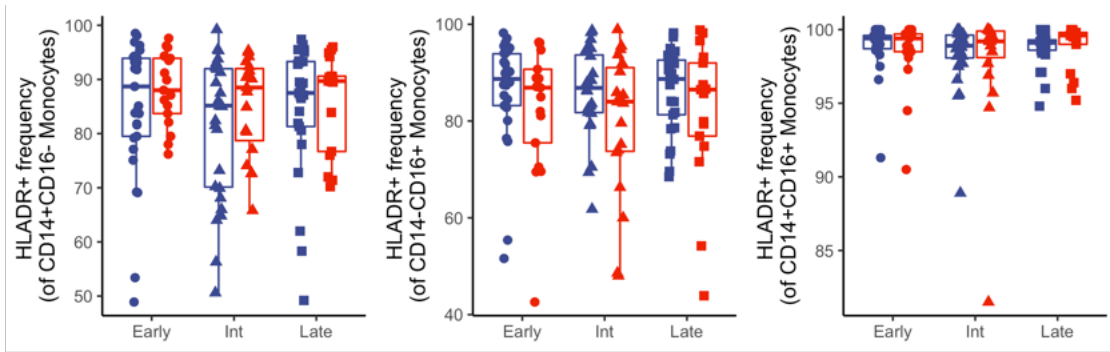

**Supplemental Figure 2: HLA-DR expression shows no difference between prolonged and recovered groups.** Investigation into HLA-DR expression on different monocyte subsets in recovered (n=30) and prolonged (n=20) individuals. HLA-DR expression is shown on CD14+ (left), CD16+ (middle), and CD14+CD16+ (right) monocyte populations. Navy=recovered group, red=prolonged group; circles=early, triangles=intermediate, squares=late. Boxplots indicate median, IQR, and 95% confidence interval; no significance determined by the unpaired Wilcoxon rank sum tests.

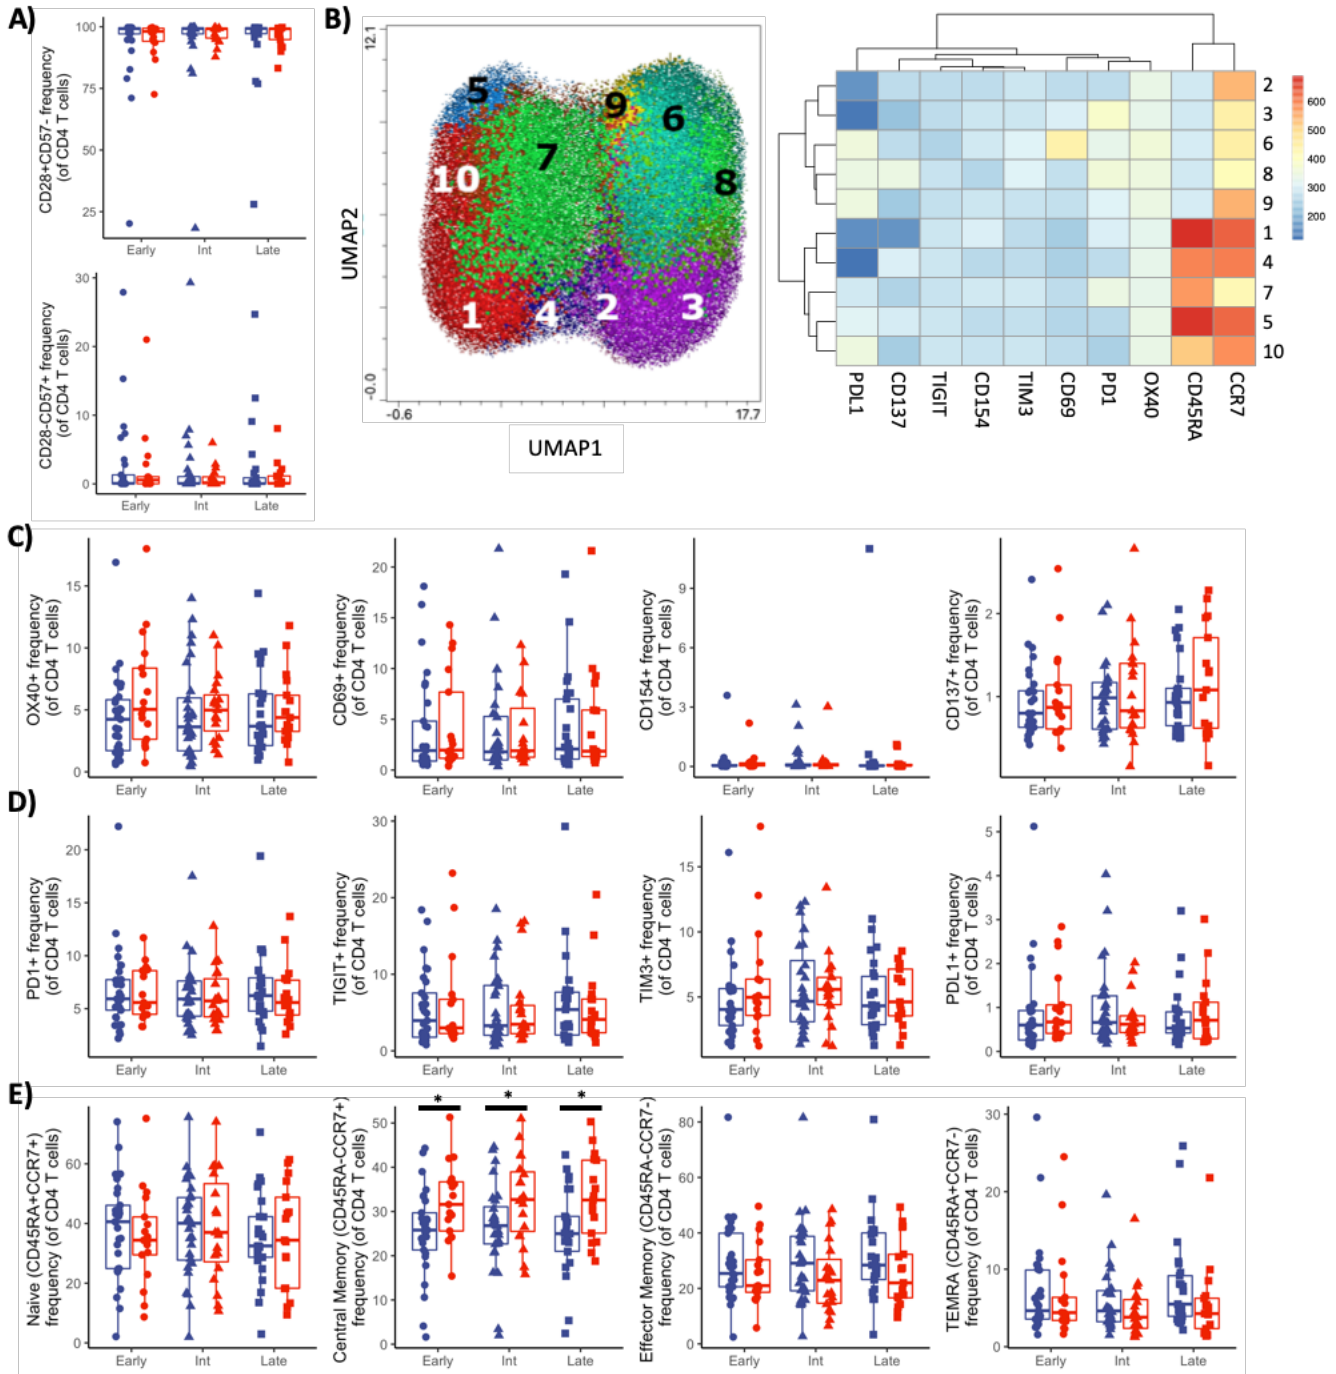

**Supplemental Figure 3: CD4+ T-cell phenotyping findings show few differences between prolonged and recovered groups. A)** Frequency of activated memory (CD28+CD57-) and senescent (CD28-CD57+) populations. **B)** Overview of UMAP clustering and corresponding heatmap with 10 total clusters identified. **C)** Expression of activation markers: OX40, CD69, CD154, and CD137. **D)** Expression of exhaustion markers: PD1, PDL1, TIGIT, and TIM3. **E)** Frequency of effector/memory populations: Naive (CD45RA+CCR7+), central memory (CD45RA-CCR7+), effector memory (CD45RA-CCR7-), and TEMRA (CD45RA+CCR7-). Navy=recovered group, red=prolonged group; circles=early, triangles=intermediate, squares=late. Boxplots indicate median, IQR, and 95% confidence interval; significance determined between recovered (n=29) and prolonged (n=20) groups by the unpaired Wilcoxon rank sum tests are indicated as follows: \*P ≤ 0.05, \*\*P ≤ 0.01, \*\*\*P ≤ 0.001.

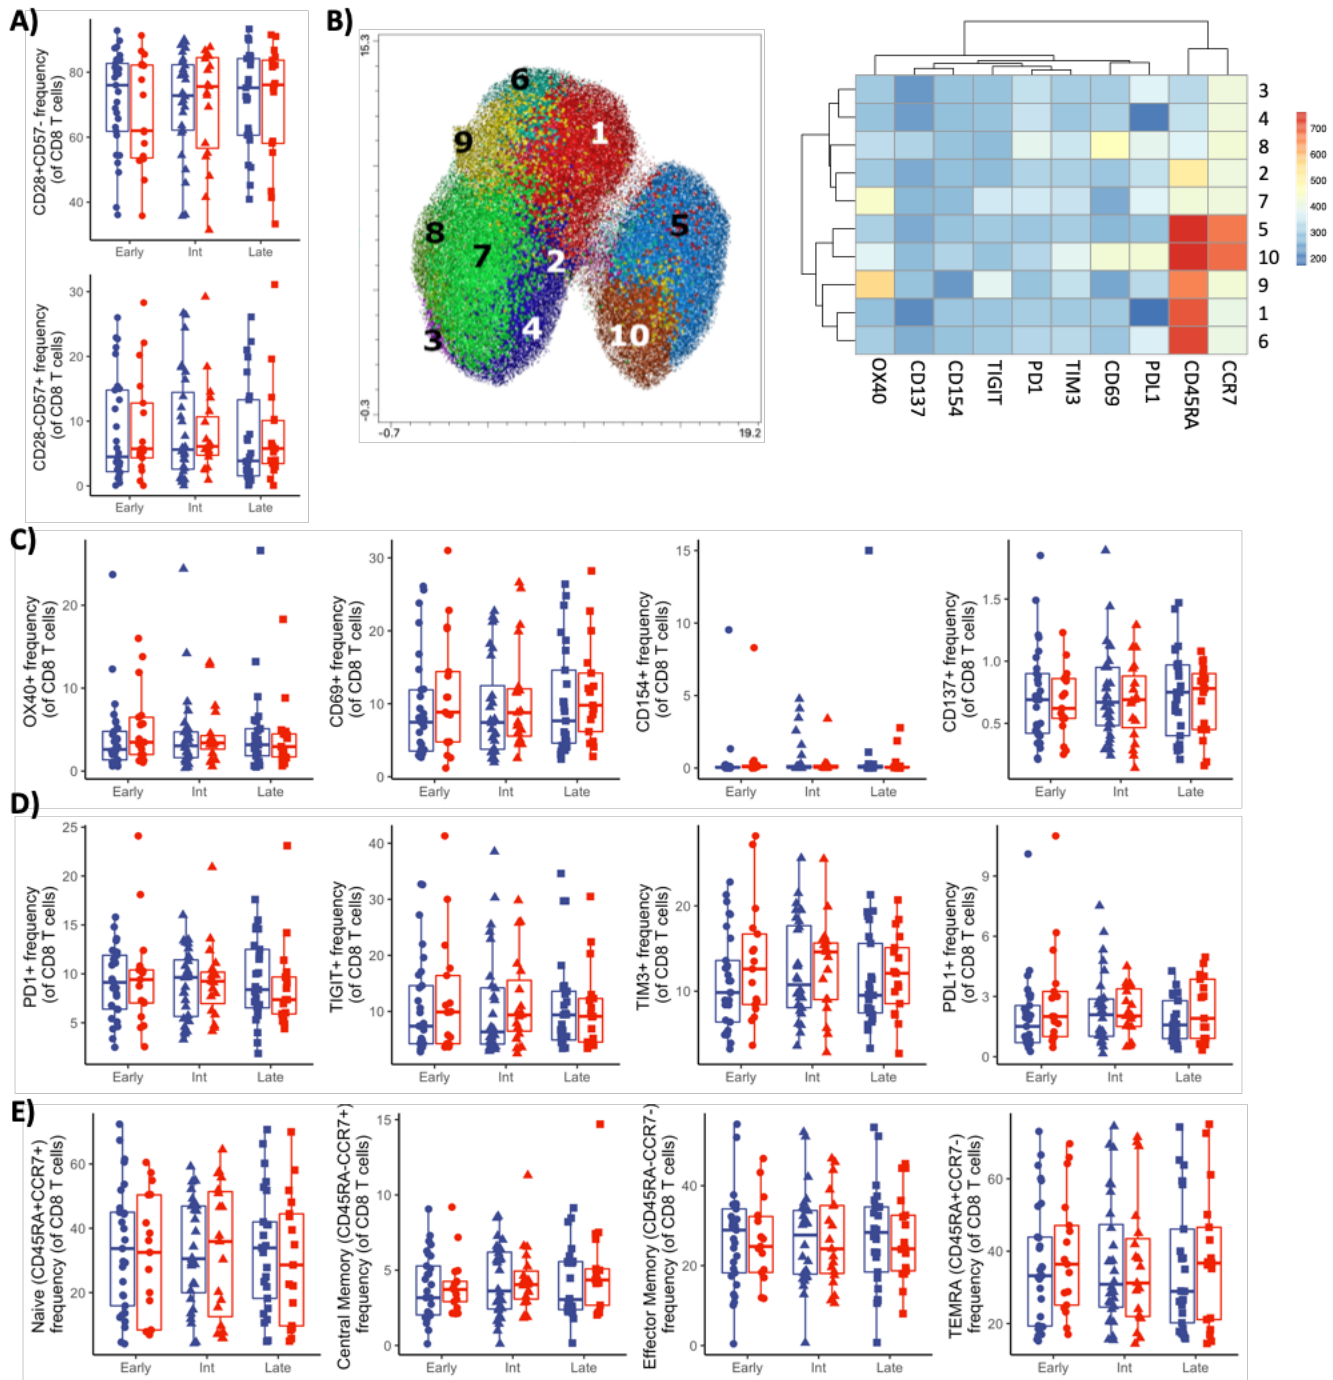

**Supplemental Figure 4: CD8+ T-cell phenotyping findings show no difference between prolonged and recovered groups.** **A)** Frequency of activated memory (CD28+CD57-) and senescent (CD28-CD57+) populations. **B)** Overview of UMAP clustering and corresponding heatmap with 10 total clusters identified. **C)** Expression of activation markers: OX40, CD69, CD154, and CD137. **D)** Expression of exhaustion markers: PD1, PDL1, TIGIT, and TIM3. **E)** Frequency of effector/memory populations: Naive (CD45RA+CCR7+), central memory (CD45RA-CCR7+), effector memory (CD45RA-CCR7-), and TEMRA (CD45RA+CCR7-). Navy=recovered group, red=prolonged group; circles=early, triangles=intermediate, squares=late. Boxplots indicate median, IQR, and 95% confidence interval; no significance determined between recovered (n=29) and prolonged (n=20) groups by the unpaired Wilcoxon rank sum tests.



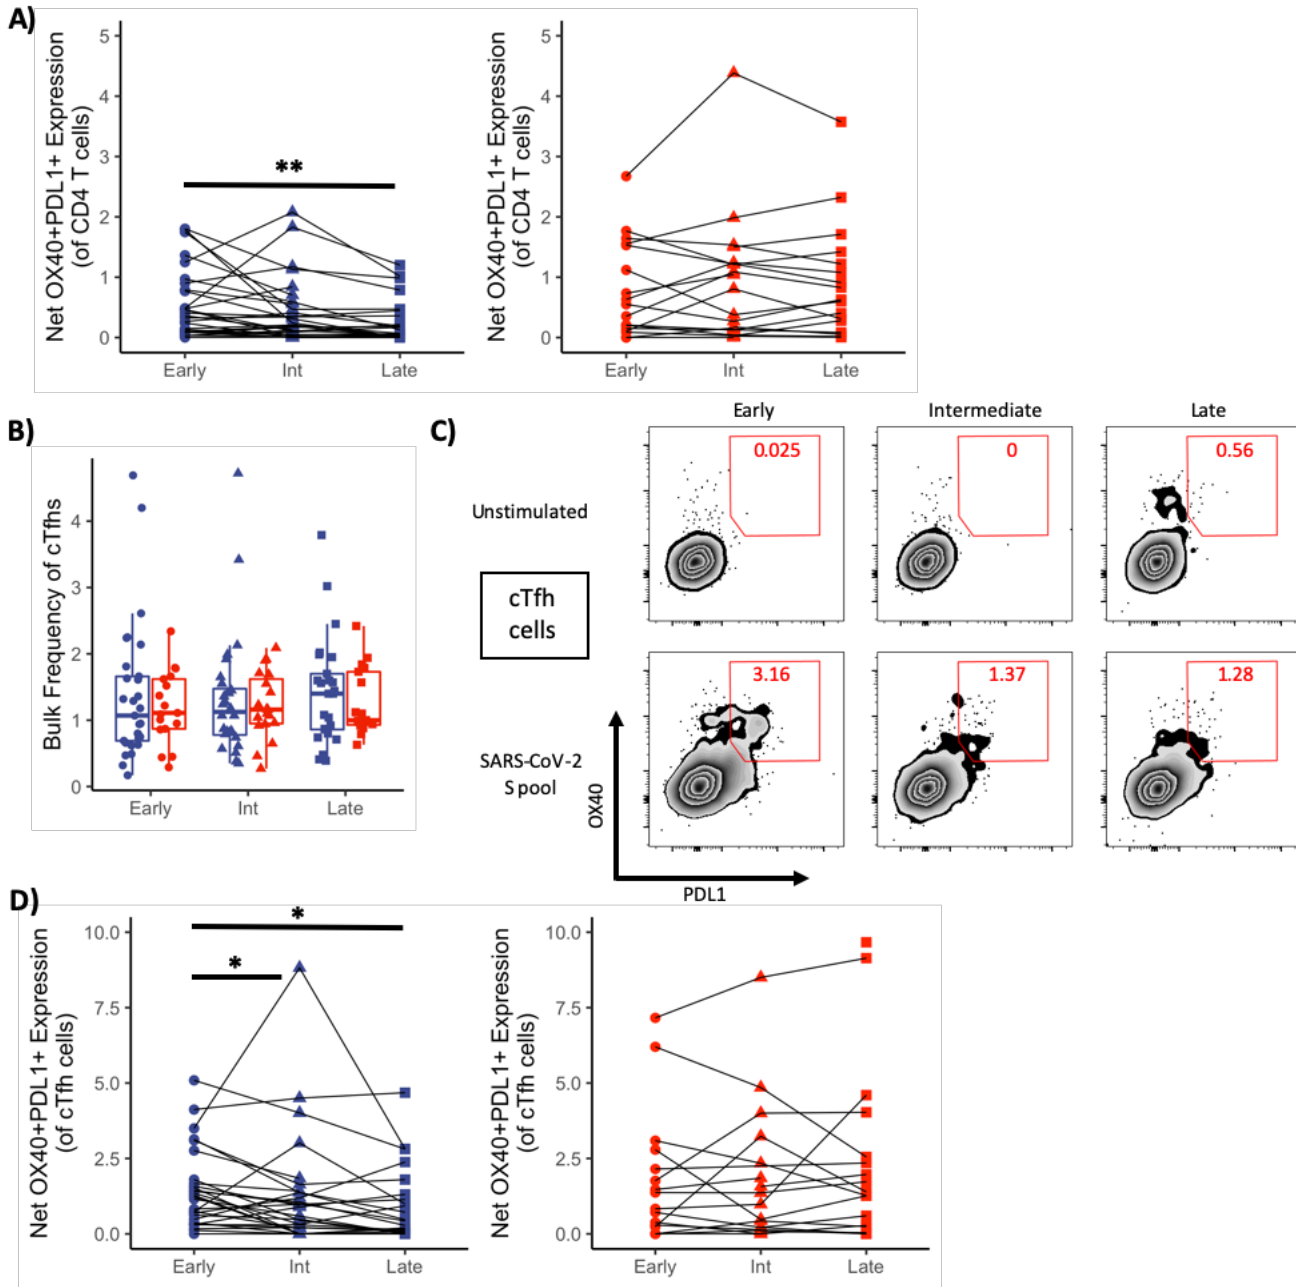

**Supplemental Figure 5: Investigation into activation marker expression in CD4+ and cTfh T-cell subsets.**  
**A)** Comparisons of the net OX40+PDL1+ response magnitude in the CD4+ T cell subset between recovered (n=29) and prolonged (n=20) groups in a paired manner; significance between groups determined by paired Wilcoxon signed rank test. **B)** Overall frequencies of cTfh cells (CXCR5+PD1+) as a percentage of the overall CD4+ T-cell population in recovered (n=29) and prolonged (n=20) groups; no significance determined by the unpaired Wilcoxon rank sum tests. **C)** Representative example of cTfh activation marker gating strategy. **D)** Comparisons of the net OX40+PDL1+ response magnitude in the cTfh T cell subset between recovered (n=29) and prolonged (n=20) groups in a paired manner; significance between groups determined by paired Wilcoxon signed rank test. Navy=recovered group, red=prolonged group; circles=early, triangles=intermediate, squares=late. Boxplots indicate median, IQR, and 95% confidence interval; significance indicated as follows: \*P ≤ 0.05, \*\*P ≤ 0.01, \*\*\*P ≤ 0.001.

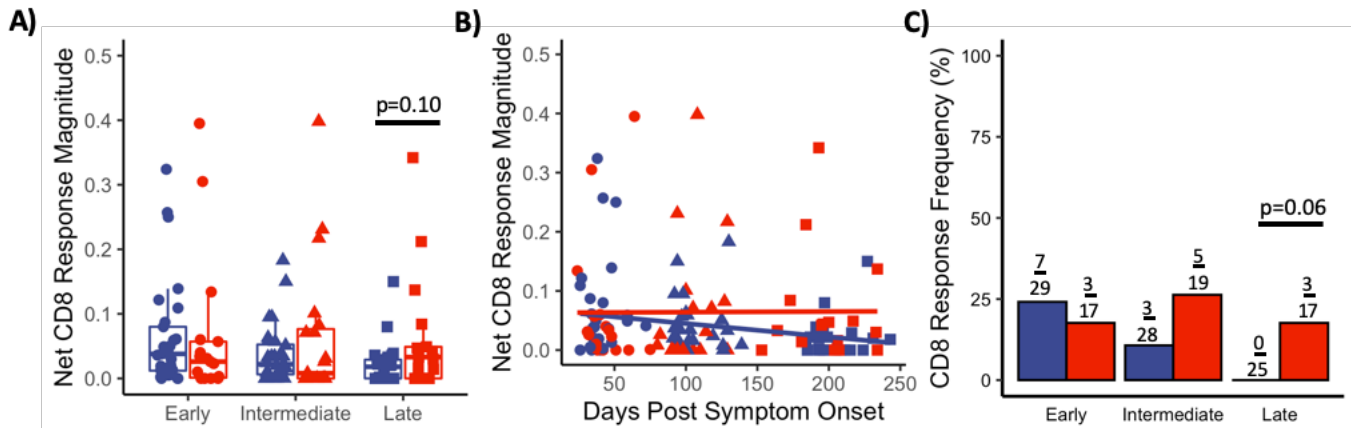

**Supplemental Figure 6: Trend towards persistent S-protein-specific CD8+ T-cell responses in individuals with prolonged symptom duration.** Investigation into the upregulation of activation markers CD69 and CD137 in CD8+ T-cells. **A)** Comparisons of the net CD69+CD137+ response magnitude between recovered (n=29) and prolonged (n=20) groups; significance between groups determined by unpaired Wilcoxon rank sum. **B)** Comparisons of the net CD8+ T-cell response magnitude longitudinally by days post symptom onset (n=135 across all three timepoints); significance determined by linear mixed effect modeling. **C)** Frequencies of CD8+ T-cell responses meeting positivity criteria; significance determined by Fisher's exact test. Navy=recovered group, red=prolonged group; circles=early, triangles=intermediate, squares=late. Boxplots indicate median, IQR, and 95% confidence interval; significance is indicated as follows: \* $P \leq 0.05$ , \*\* $P \leq 0.01$ , \*\*\* $P \leq 0.001$ .

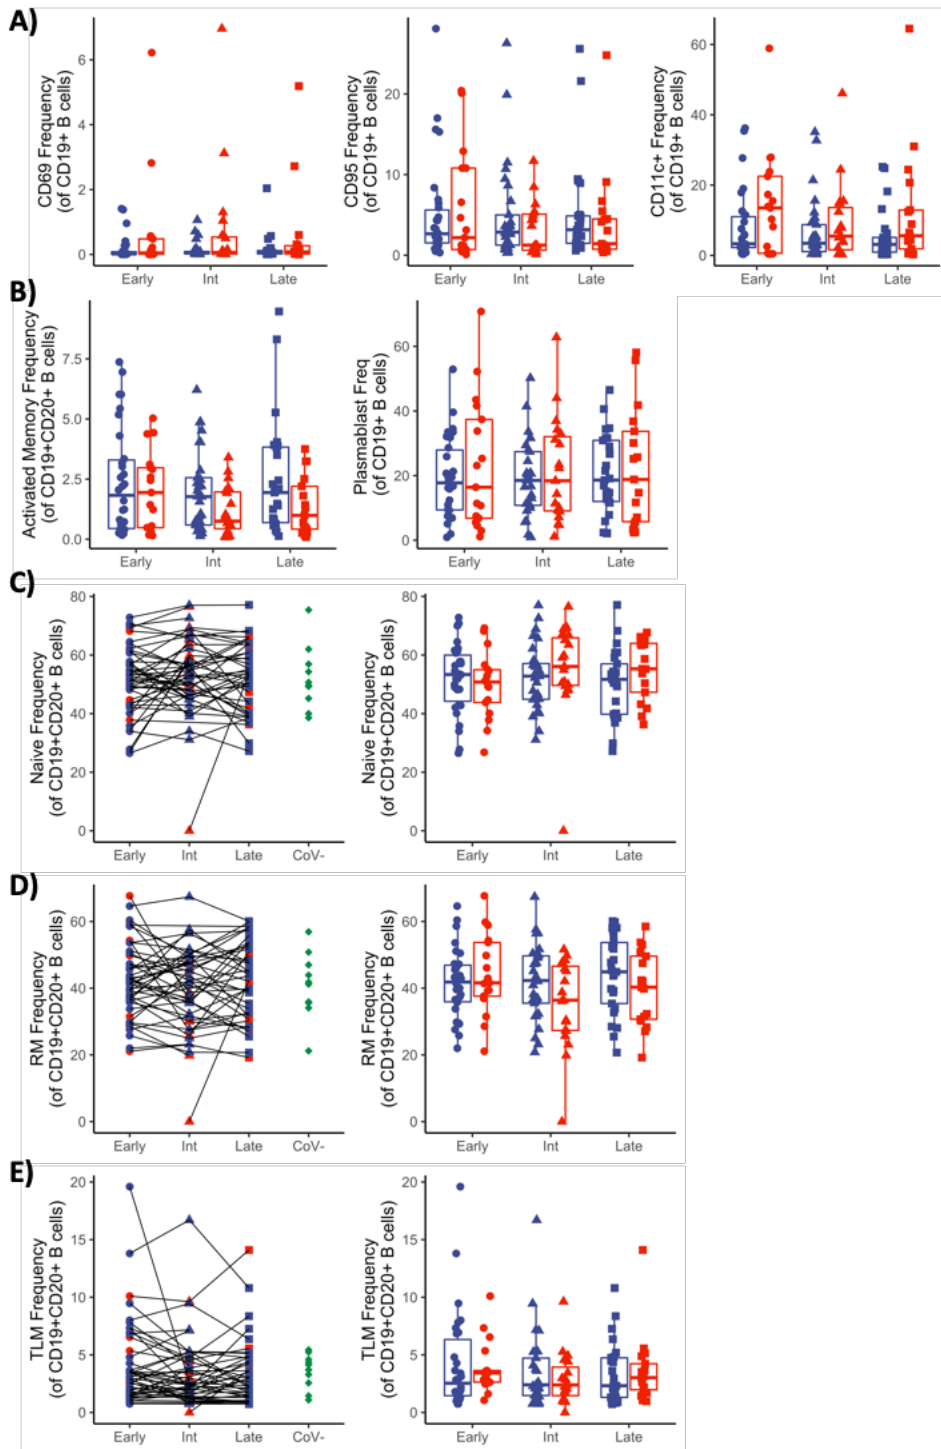

**Supplemental Figure 7: B cell phenotyping data shows no differences between prolonged and recovered groups.** A-B) Comparison between recovered (n=30) and prolonged (n=20) groups of the activation markers CD69, CD95 and CD11c, as well as the activated memory and plasmablast B-cell subsets. C-E) Longitudinal analysis and group comparison between recovered (n=30) and prolonged (n=20) groups of additional B-cell subsets: (C) Naive B cell, (D) Resting Memory (RM) and (E) Tissue-like Memory (TLM). Navy=recovered group, red=prolonged group; circles=early, triangles=intermediate, squares=late. Boxplots indicate median, IQR, and 95% confidence interval; no significance between groups determined by unpaired Wilcoxon rank sum or paired Wilcoxon signed rank tests.



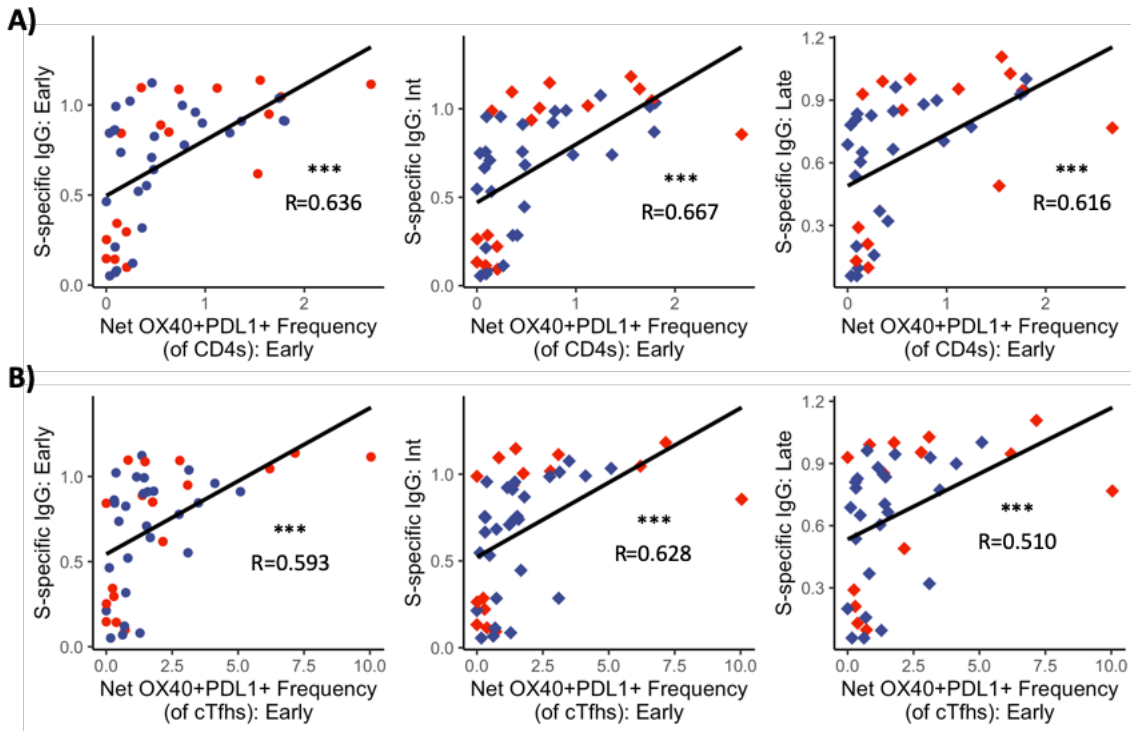

**Supplemental Figure 8: Significant correlations between S-specific IgG with net CD4+ T-cell and cTfh response magnitudes.** Investigation into correlations between antigen-specific T-cell responses and S-protein-specific IgG binding for all individuals ( $n=49$ ). **A)** Correlation graphs between S protein-specific CD4+ T-cell response magnitude at the early timepoint and S-specific IgG at all three timepoints. **B)** Correlation graphs between S protein-specific cTfh T-cell response magnitude at the early timepoint and S-specific IgG at all three timepoints. Navy=recovered group, red=prolonged group; circles=early timepoint, diamonds=mismatch timepoint. Significance determined by Spearman's rank-order correlation and are denoted as follows:  $*P \leq 0.05$ ,  $**P \leq 0.01$ ,  $***P \leq 0.001$ .

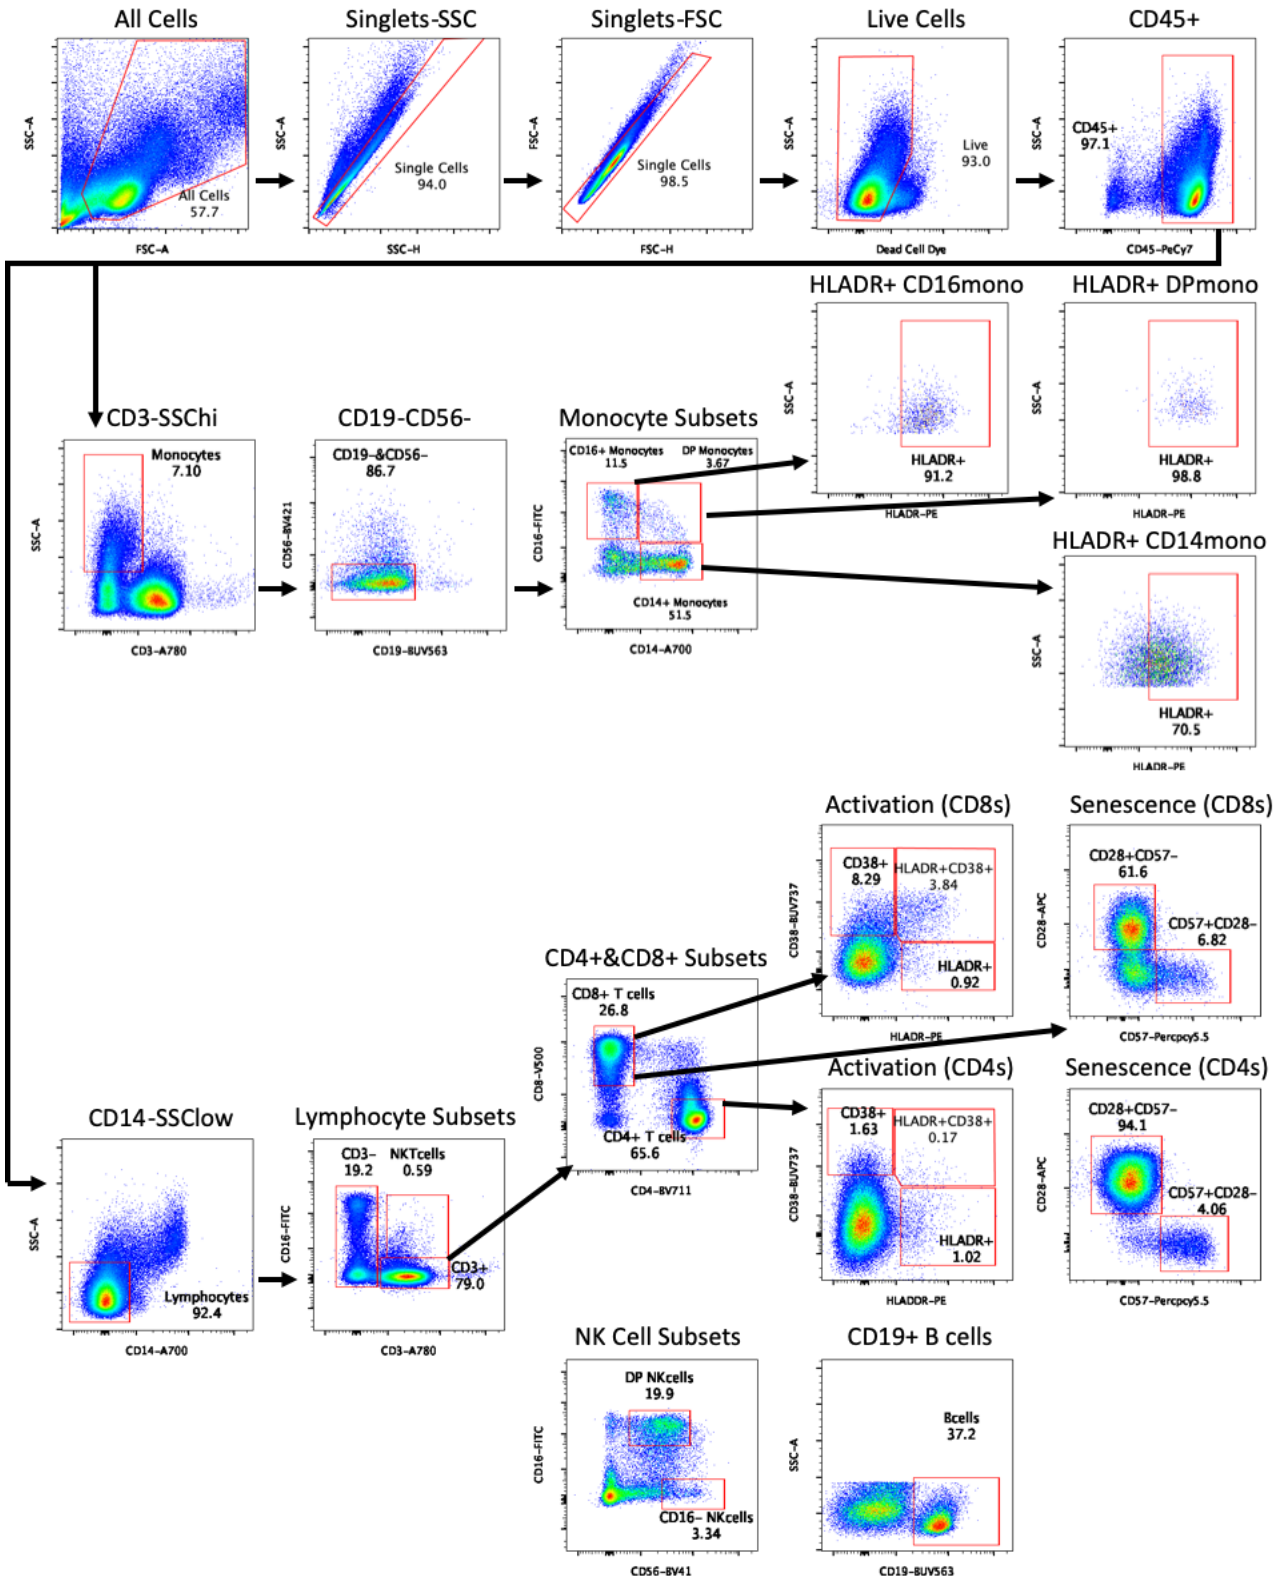

**Supplemental Figure 9: Cell Subset Gating Strategy**

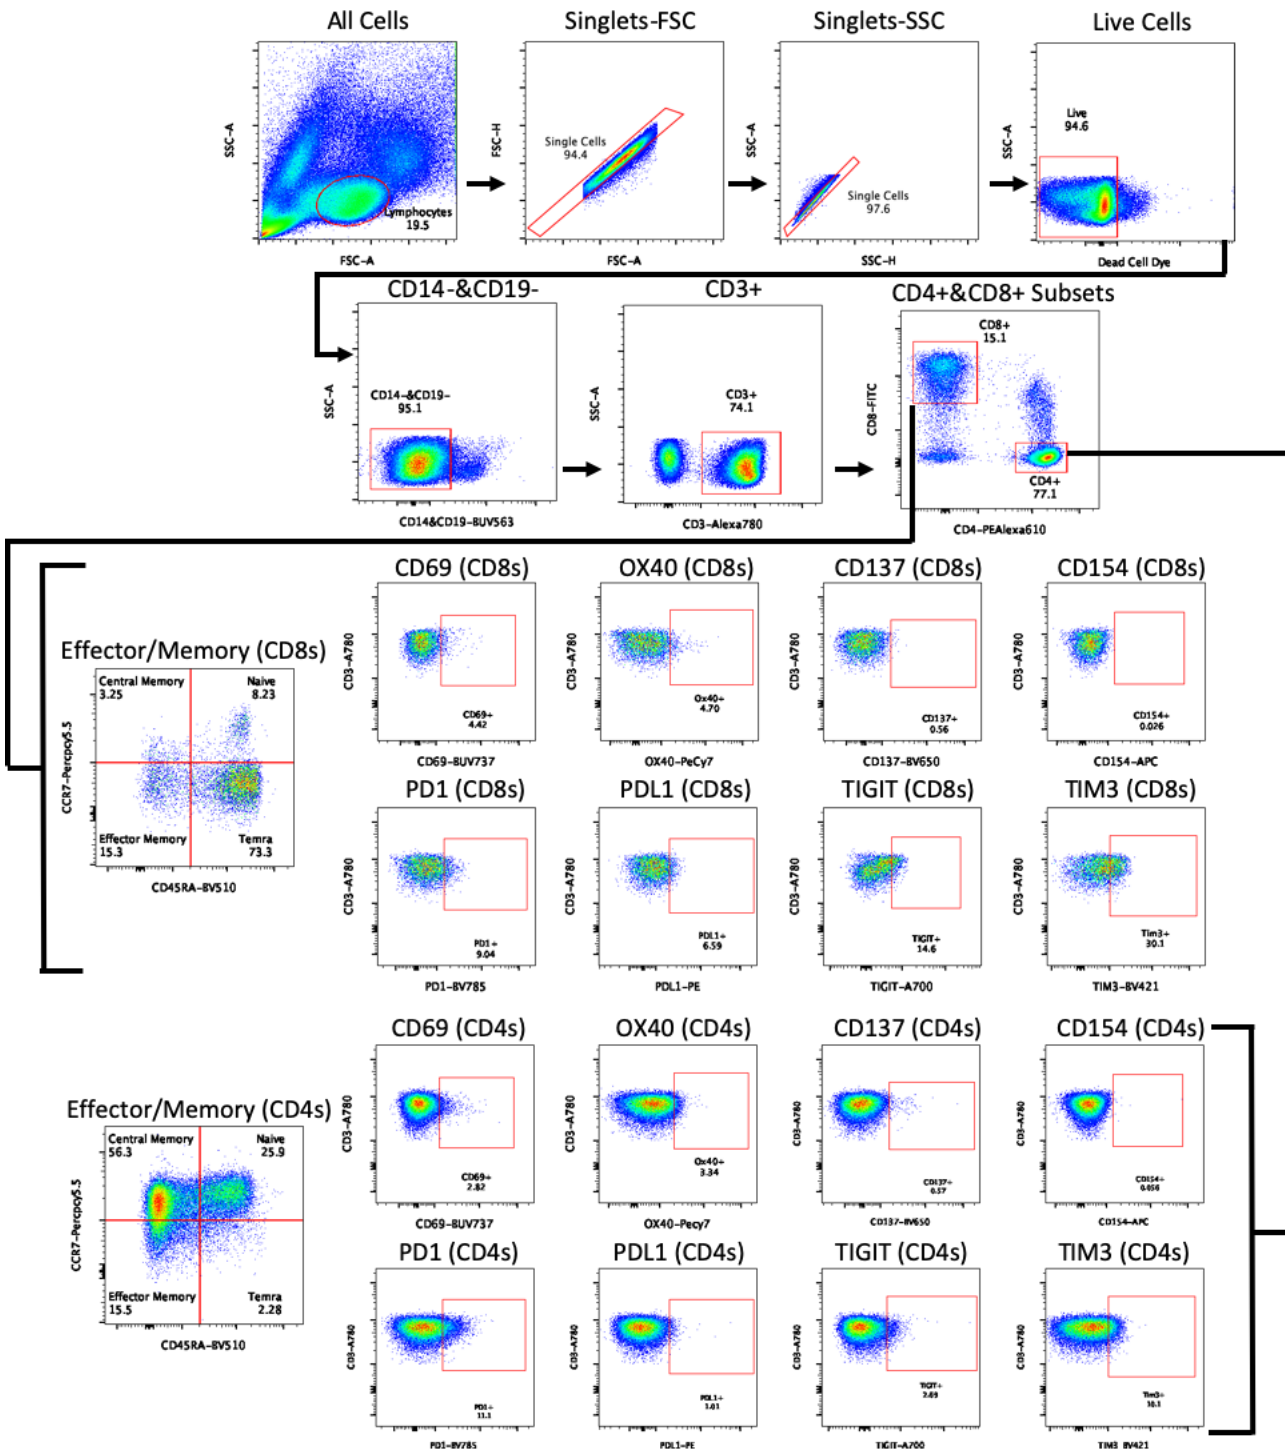

Supplemental Figure 10: T-cell Phenotyping Gating Strategy

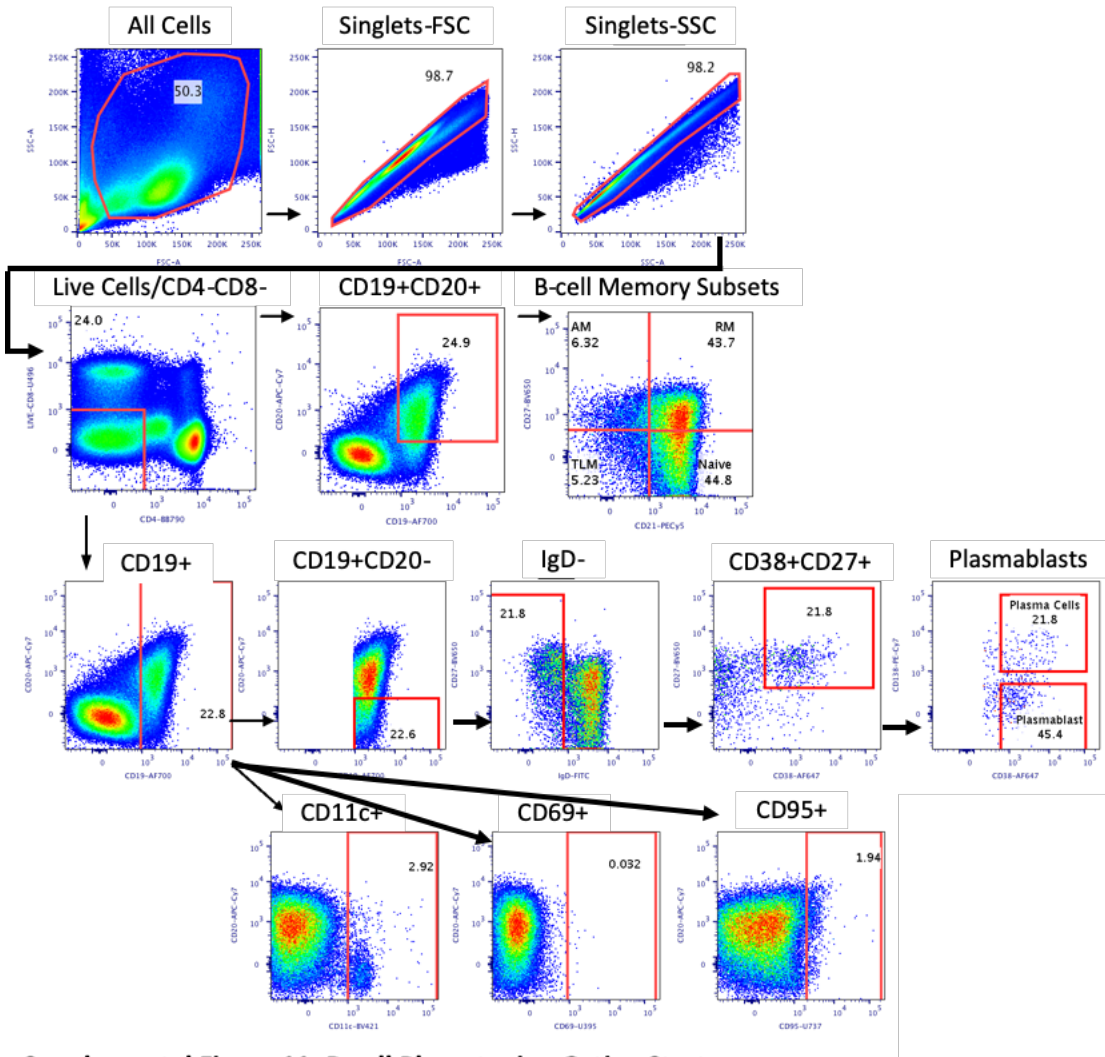

**Supplemental Figure 11: B-cell Phenotyping Gating Strategy**

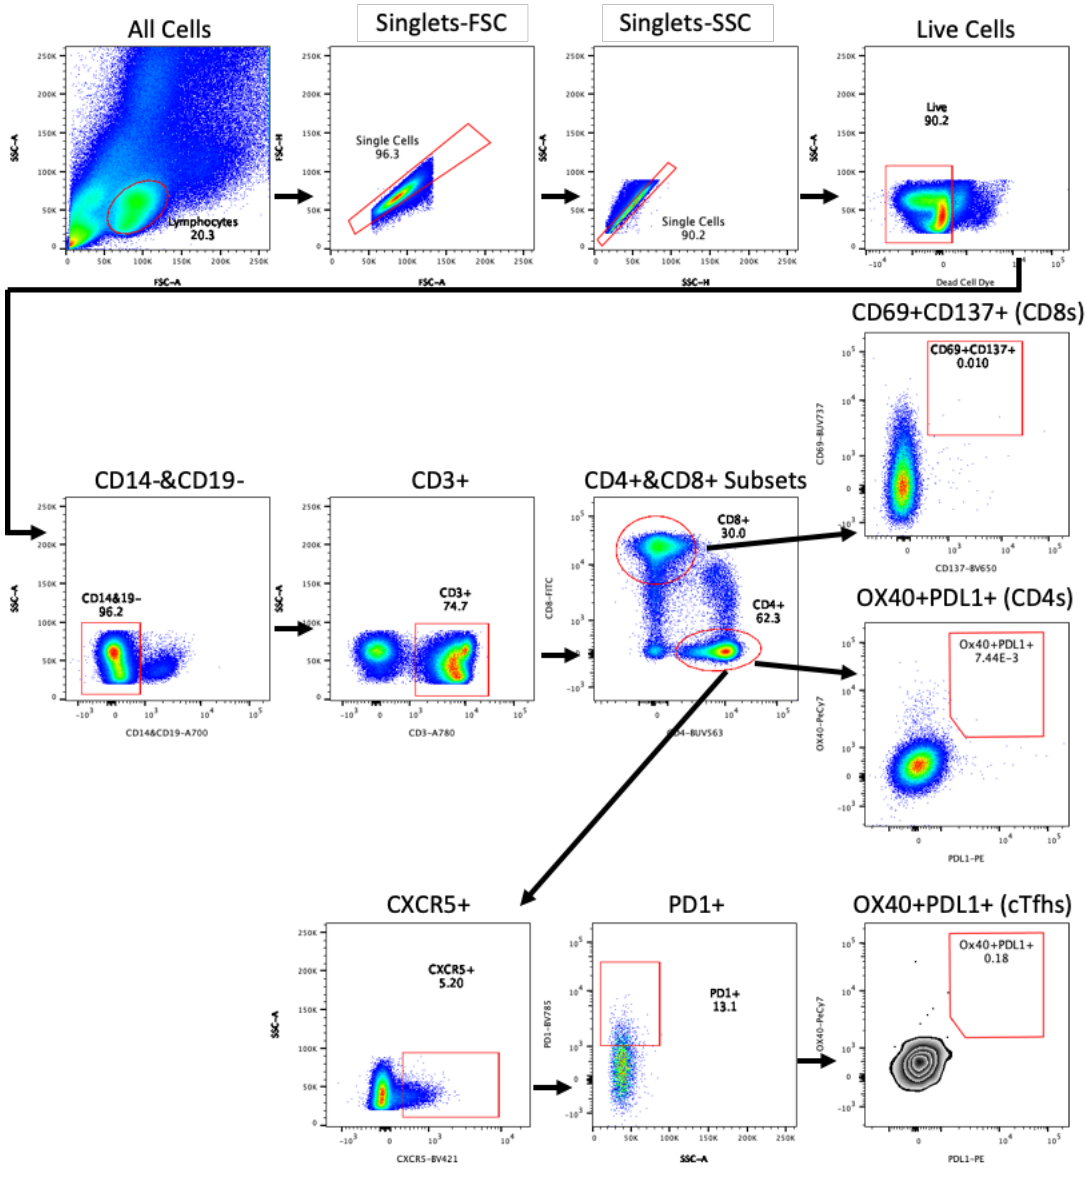

Supplemental Figure 12: Antigen-Specific T-cell Gating Strategy
